# Supplementary material for: Preclinical study of a novel therapeutic vaccine for recurrent respiratory papillomatosis
Source: NPJ Vaccines. 2021 Jun 18;6:86. doi: 10.1038/s41541-021-00348-x (PMC8213691; doi:10.1038/s41541-021-00348-x)
Supplement: Supplementary file 1 — Supplementary Information [file 41541_2021_348_MOESM1_ESM.pdf]

## Supplemental Figures

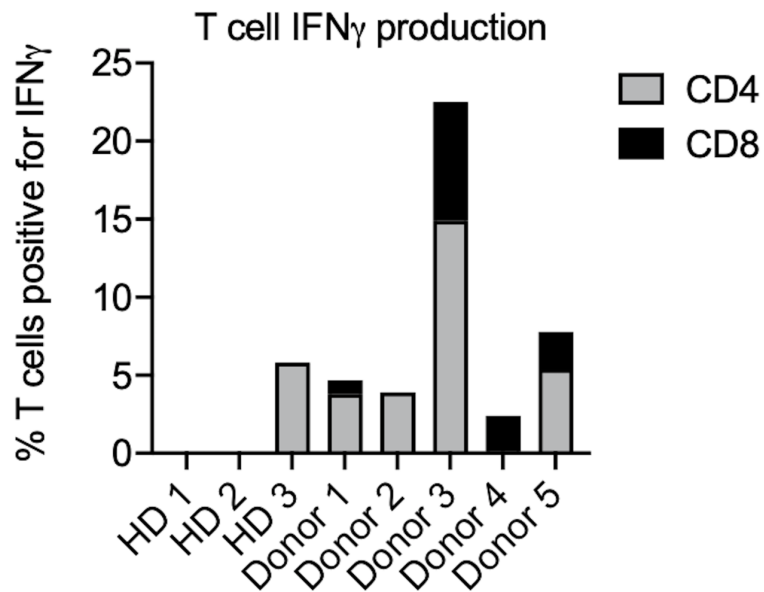

**Supplementary Figure 1 – PRGN-2012 induced IFN $\gamma$  production in both CD8+ and CD4+**

### **T lymphocytes**

Quantification of percentage of T lymphocytes positive for IFN $\gamma$  assessed via intracellular flow cytometry following in vitro stimulation as in Figure 1.

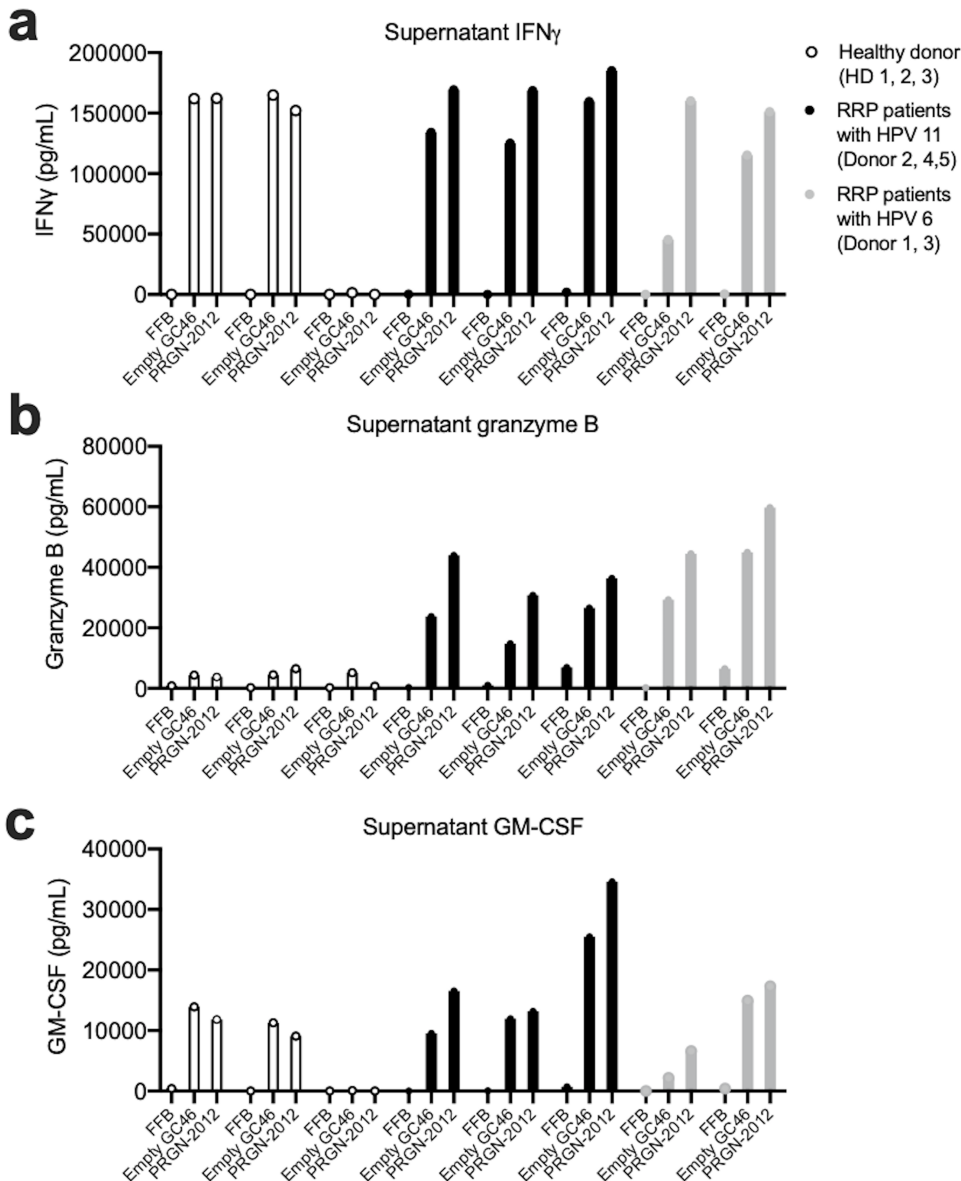

**Supplementary Figure 2 – PRGN-2012 induced both antigen-specific and antigen-independent inflammation**

Un-normalized supernatant quantification of (A) IFN $\gamma$ , (B) granzyme B and (C) GM-CSF from co-cultures assessing HPV antigen-specific responses in T lymphocytes isolated from the blood of patients with HPV 11-driven RRP (n = 3, black bars), HPV 6-driven RRP (n = 2, grey bars) or healthy donors (n= 3, open bars) following two rounds of *in vitro* simulation with PRGN-2012 or empty GC46.

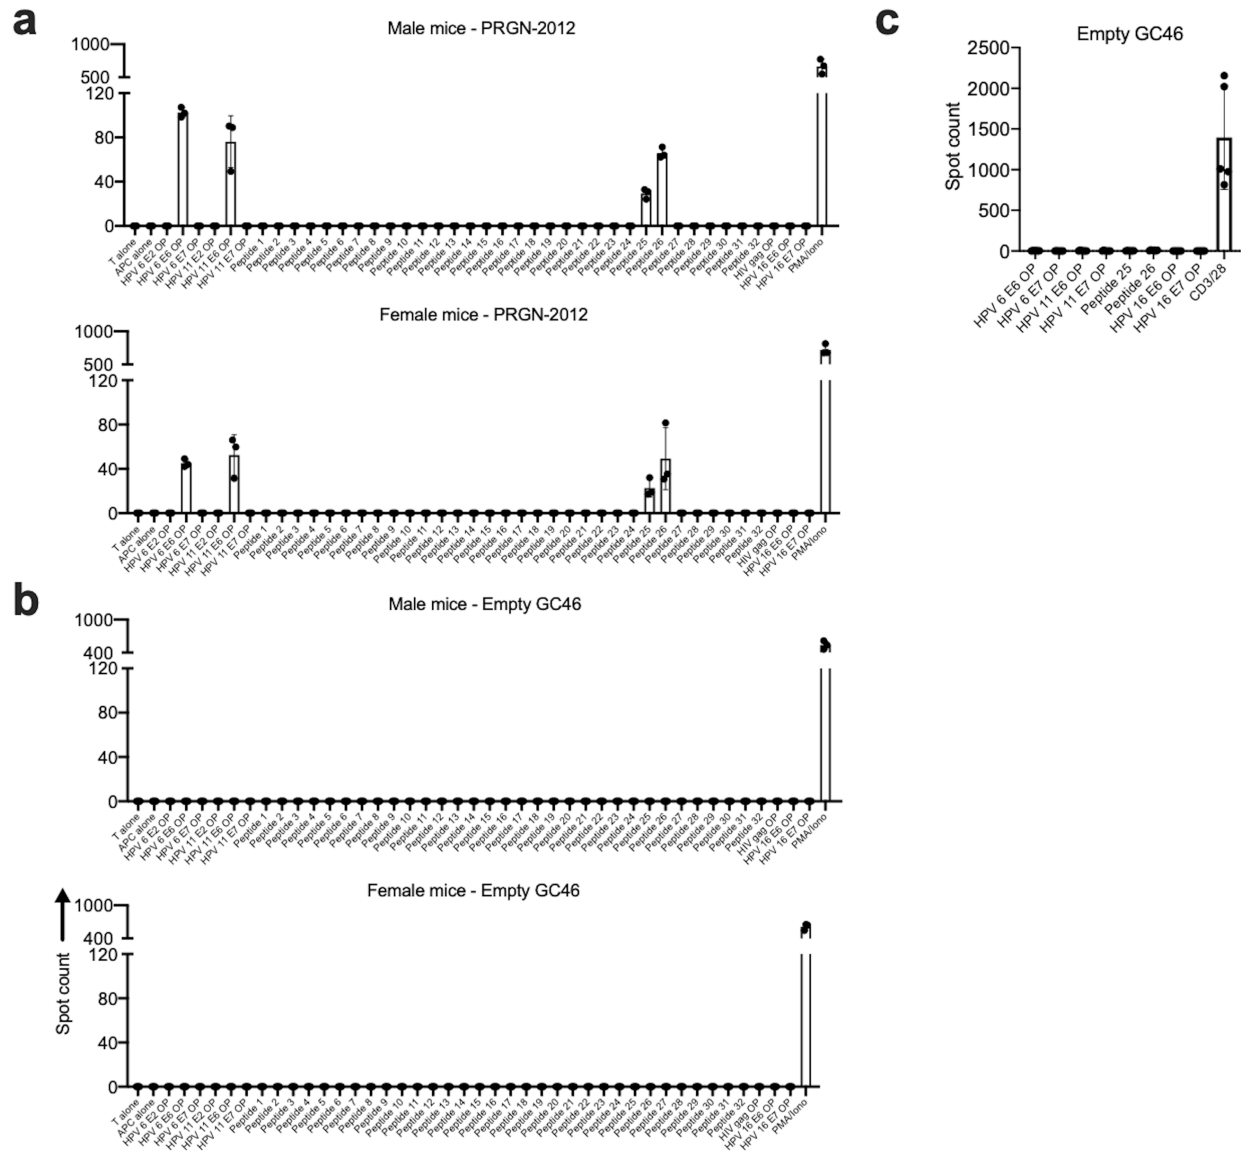

### Supplementary Figure 3 – Induction of HPV antigen-specific immunity following vaccination in male and female mice

Quantification of IFN $\gamma$  spots in male and female mice (n = 3/group) vaccinated with (A) PRGN-2012 or (B) empty GC46.

C, quantification of IFN $\gamma$  spots in female mice vaccinated with empty GC46 in an independent experiment.



**Supplementary Table I. HLA class I haplotypes of RRP patients whose blood products were used for in vitro stimulation with PRGN-2012.**

| Identification | HPV serotype | HLA-A   | HLA-B   | HLA-C   |
|----------------|--------------|---------|---------|---------|
| Donor 1        | 6            | *01/*02 | *08/*37 | *06/*07 |
| Donor 2        | 11           | *01/*32 | *08/*14 | *07/*08 |
| Donor 3        | 6            | *03/*11 | *14/*18 | *05/*08 |
| Donor 4        | 11           | *01/*01 | *08/*08 | *07/*07 |
| Donor 5        | 11           | *01/*24 | *08/*39 | *07/*07 |
